1 **Therapeutic base and prime editing of *COL7A1* mutations in recessive**  
2 **dystrophic epidermolysis bullosa**

3  
4 Sung-Ah Hong<sup>1,2,†</sup>, Song-Ee Kim<sup>3,†</sup>, A-young Lee<sup>3</sup>, Gue-Ho Hwang<sup>1,2</sup>, Jong Hoon Kim<sup>3</sup>,  
5 Hiroaki Iwata<sup>4</sup>, Soo-Chan Kim<sup>5</sup>, Sangsu Bae<sup>1,2,\*</sup>, Sang Eun Lee<sup>3,\*</sup>

6  
7 <sup>1</sup>*Department of Chemistry, Hanyang University, Seoul 04763, South Korea;*

8 <sup>2</sup>*Research Institute for Natural Sciences, Hanyang University, Seoul 04763, South Korea;*

9 <sup>3</sup>*Department of Dermatology and Cutaneous Biology Research Institute, Gangnam Severance*  
10 *Hospital, Yonsei University College of Medicine, Seoul, Korea;*

11 <sup>4</sup>*Department of Dermatology, Hokkaido University Graduate School of Medicine, Sapporo,*  
12 *Japan.*

13 <sup>5</sup>*Department of Dermatology, Yongin Severance Hospital, Yonsei University College of*  
14 *Medicine, Yongin, South Korea.*

15 <sup>†</sup>*These authors contributed equally to this work.*

16  
17 \*Email: [sangsubae@hanyang.ac.kr](mailto:sangsubae@hanyang.ac.kr) (S.B.) and [JENNIFER823@yuhs.ac](mailto:JENNIFER823@yuhs.ac) (S.E.L.)

18

19 **ABSTRACT**

20 Recessive dystrophic epidermolysis bullosa (RDEB) is a severe skin fragility disorder caused  
21 by loss-of-function mutations in the *COL7A1* gene, which encodes type VII collagen (C7), a  
22 protein that functions in skin adherence. From 36 Korean RDEB patients, we identified a total  
23 of 69 pathogenic mutations (40 variants without recurrence), including point mutations (72.5%)  
24 and insertion/deletion mutations (27.5%). We used base and prime editing to correct mutations  
25 in fibroblasts from two patients (Pat1, who carried a c.3631C>T mutation in one allele, and  
26 Pat2, who carried a c.2005C>T mutation in one allele). We applied adenine base editors (ABEs)  
27 to correct the pathogenic mutation or to bypass a premature stop codon in Pat1-derived primary  
28 fibroblasts. To expand the targeting scope, we also utilized prime editors (PEs) to correct the  
29 mutations in Pat1- and Pat2-derived fibroblasts. Ultimately, we found that both ABE- and PE-  
30 mediated correction of *COL7A1* mutations restored full-length C7 expression, reversed the  
31 impaired adhesion and proliferation exhibited by the patient-derived fibroblasts, and, following  
32 transfer of edited patient-derived fibroblasts into the skin of immunodeficient mice, led to C7  
33 deposition within the dermal-epidermal junction. These results suggest that base and prime  
34 editing could be feasible strategies for *ex vivo* gene editing to treat RDEB.

35

36

37 **KEY WORDS**

38 Recessive dystrophic epidermolysis bullosa, CRISPR, Genome editing, Base editing, Prime  
39 editing, Type VII collagen

40

## 41 INTRODUCTION

42 Epidermolysis bullosa (EB) is a heterogeneous group of genodermatoses characterized by  
43 mucocutaneous fragility. Recessive dystrophic EB (RDEB), one of the most severe subtypes  
44 of EB, results from biallelic mutations in the *COL7A1* gene, which encodes the alpha 1 chain  
45 of type VII collagen (C7). C7 is a key component of anchoring fibrils, which create a strong  
46 attachment between the epidermis and dermis. Loss of C7 causes extensive mucocutaneous  
47 blistering, scarring, and extracutaneous complications, leading to considerable morbidity and  
48 occasional mortality.<sup>[1]</sup> Therefore, effective treatments are urgently needed. To date, various  
49 therapeutic strategies, including protein replacement,<sup>[2]</sup> disease-modifying drugs,<sup>[3]</sup> and  
50 allogeneic cell-based therapies using fibroblasts,<sup>[4]</sup> mesenchymal stromal cells,<sup>[5]</sup> and bone  
51 marrow transplantation<sup>[6]</sup> have been studied, but a complete cure is not achievable with those  
52 current approaches. As a potential long-lasting therapeutic option, remarkable progress has  
53 been made in gene therapy that aimed to transfer the normal *COL7A1* gene into deficient cells  
54 from RDEB patients. In this strategy, it is advantageous to use autologous cells for gene transfer.  
55 Early phase clinical trials using viral vectors such as lentivirus and retrovirus<sup>[7]</sup> to transduce  
56 *COL7A1* into autologous fibroblasts and keratinocytes have resulted in C7 restoration in the  
57 treated skin of some RDEB patients for more than 1 or 2 years after treatment. Despite these  
58 promising results, such viral vector-based gene therapy has potential concerns: i) random  
59 integration of viral vectors into the host genome, ii) continued expression of aberrant transcripts  
60 from the endogenous *COL7A1* gene, and iii) different levels of constitutive expression from  
61 the virus-delivered exogenous gene regardless of the cellular environment.

62 To overcome these limitations, therapeutic editing of the endogenous *COL7A1* gene in  
63 patients' autologous cells via genome editing tools has been suggested for RDEB treatment.<sup>[8]</sup>  
64 Conventional CRISPR nucleases rely on double-strand breaks (DSBs) in the target DNA,  
65 which are repaired by one of the cell's repair systems, such as non-homologous end joining  
66 (NHEJ) or homology-directed repair (HDR).<sup>[9]</sup> Previously, several groups demonstrated the  
67 feasibility of correcting the reading frame<sup>[8e, 8f]</sup> or skipping a mutant exon<sup>[8g-i]</sup> in mutant  
68 *COL7A1* using CRISPR-coupled NHEJ repair. However, these strategies have limited value  
69 for the correction of point mutations, the most common type of mutation in RDEB. In contrast,  
70 the use of HDR enables the precise correction of point mutations, but its low editing efficacy,  
71 requirement for donor templates, and limited activity in non-dividing cells are obstacles for  
72 HDR-mediated approaches. Furthermore, recent studies have revealed that CRISPR nuclease-  
73 mediated DSBs can induce unwanted large deletions, chromosomal rearrangements,<sup>[10]</sup> and a  
74 p53-mediated DNA damage response<sup>[11]</sup> that results in cell death, potentially inhibiting further  
75 clinical applications.

76 To bypass such risks, newly developed tools that generate few DSBs, such as base editors  
77 (BEs) and prime editors (PEs), can be used.<sup>[12]</sup> BEs, which include cytosine base editors  
78 (CBEs)<sup>[13]</sup> and adenine base editors (ABEs)<sup>[14]</sup>, can convert one target nucleotide into another,  
79 C-to-T or A-to-G, by catalyzing cytosine or adenine deamination, respectively. A recent report  
80 described an ABE-mediated strategy in which two nonsense mutations in *COL7A1* were  
81 corrected *ex vivo* in RDEB patient-derived fibroblasts and induced pluripotent stem cells,

82 resulting in therapeutic effects such as C7 restoration.<sup>[15]</sup> However, despite their therapeutic  
83 potential, BEs have limited ability to correct small insertion and deletion (indel) mutations or  
84 transversion mutations such as C-to-G/A and A-to-C/T. Alternatively, PEs can generate all  
85 types of substitutions and indels within about a 40-bp sequence. A practical version of PE, PE2,  
86 which consists of a Cas9 nickase (nCas9) that contains a H840A mutation and an engineered  
87 reverse transcriptase, is recruited to the target site by a prime editing guide RNA (pegRNA).<sup>[16]</sup>  
88 The pegRNA is composed of a standard single-guide RNA (sgRNA) and an extension sequence  
89 at the 3' end that includes a primer binding site (PBS) and a reverse transcription template  
90 (RTT) that encodes the desired correction. To maximize PE efficacy, PE3 employs an additional  
91 nicking sgRNA (ngRNA) for inducing a second nick in the non-edited strand. However, prime  
92 editing has not yet been demonstrated for RDEB treatment.

93 In this study, we established a *COL7A1* mutation database from a large cohort of South  
94 Korean patients with RDEB and analyzed the percentage of mutations that are potentially  
95 targetable by BEs and PEs. We then applied either ABE or PE3 to correct the mutations in  
96 primary fibroblasts from two patients with highly recurrent *COL7A1* mutations. We further  
97 transplanted the ABE-/PE-corrected primary fibroblasts into immunodeficient mice and  
98 observed strong linear deposition of human type VII collagen (C7) at the dermal-epidermal  
99 junction (DEJ), supporting the therapeutic potential of *ex vivo* ABE- or PE-mediated gene  
100 editing for treating RDEB.

101

## 102 **RESULTS**

### 103 **Establishment and analysis of a *COL7A1* mutation database specific for Korean RDEB** 104 **patients**

105 Using an *in silico* approach, we first inspected all known RDEB-associated *COL7A1*  
106 variations among the world-wide population of patients, and determined which ones would be  
107 targetable with BEs and PEs. According to the *COL7A1* variants database ([http://www.col7a1-](http://www.col7a1-database.info)  
108 [database.info](http://www.col7a1-database.info)), a total of 810 *COL7A1* gene variants causing RDEB are currently registered, of  
109 which 23.6% are indel mutations and 76.4% are point mutations, including nonsense, missense,  
110 synonymous, and intron mutations (**Figure 1A**). Among the *COL7A1* point mutations, 2.9%  
111 (i.e., A>G or T>C) and 26.2% (i.e., G>A or C>T), respectively, can theoretically be corrected  
112 by CBEs and ABEs derived from SpCas9 (Cas9 from *Streptococcus pyogenes*), which  
113 recognize a canonical 5'-NGG-3' protospacer adjacent motif (PAM). When NG-PAM-  
114 targetable BEs are used instead, 6.0% and 37.6% of mutations are covered by CBEs and ABEs,  
115 respectively.<sup>[17]</sup> In contrast, given that PEs can correct all types of point mutations as well as  
116 indel mutations, 96.2% of the mutations can potentially be corrected by NG-PAM-targetable  
117 PEs (**Figure 1A**).

118 Similarly, we further investigated the editing scope of both BEs and PEs for correcting  
119 pathogenic *COL7A1* mutations found in Korean patients suffering from RDEB. To this end,  
120 using information from the only EB referral center in South Korea, we established the largest  
121 database of *COL7A1* mutations in Korean RDEB patients and identified a total of 69

122 pathogenic mutations (40 variants without recurrence) from a total of 36 patients. Of the 40  
123 mutations, 72.5% were point mutations, including missense (35.0%), nonsense (25.0%), and  
124 intron (12.5%) mutations, whereas 27.5% were indel mutations (**Figure 1B** and **Table S1**).  
125 Among the point mutations, 27.5% can theoretically be corrected by NGG-PAM-targetable  
126 ABEs, and 42.5% can theoretically be corrected by NG-PAM-targetable ABEs. When PEs were  
127 considered, we found that 97.5% of the mutations would be covered by NG-PAM-targetable  
128 PEs (**Figure 1B**), consistent with the situation for the world-wide population of patients.

129 In the Korean RDEB database, c.8569G>T (p.E2857X), c.2005C>T (p.R669X), and  
130 c.3631C>T (p.Q1211X) were the most recurrent RDEB-causing *COL7A1* mutations,  
131 representing 14.5% (10/69), 7.2% (5/69), and 7.2% (5/69) of the mutant alleles, respectively  
132 (**Figure 1C**). Among these, c.2005C>T in exon 15 and c.3631C>T in exon 27 affect the amino-  
133 terminal non-collagenous NC-1 domain and have been reported to induce nonsense-mediated  
134 decay of *COL7A1* transcripts.<sup>[18]</sup> In addition, these two nonsense mutations have been reported  
135 to be responsible for severe generalized RDEB (**Figure 1D**).<sup>[18b, 19]</sup> Therefore, we focused on  
136 these two nonsense mutations in our cohort as targets for correction via ABEs or PEs. Two  
137 patients with moderate-to-severe RDEB who had compound heterozygous *COL7A1* nonsense  
138 mutations were enrolled in this study; patient #1 (Pat1, hereafter) carried c.3631C>T and  
139 c.8569G>T mutations and patient #2 (Pat2, hereafter) carried c.2005C>T and c.8569G>T  
140 mutations (**Figure 1D**). Skin biopsies from both patients showed only trace staining of C7 by  
141 immunofluorescence microscopy using antibodies against the NC-1 domain, whereas skin  
142 samples from healthy donors showed clear C7 staining at the DEJ (**Figure 1F**).

143

#### 144 **Adenine base editing for *COL7A1* gene correction in Pat1-derived fibroblasts**

145 To correct the C>T nonsense mutations, we first used the ABE system and prepared an  
146 optimized version of ABE7.10, named ABEmax.<sup>[20]</sup> We used two strategies to rescue *COL7A1*  
147 gene function in Pat1-derived fibroblasts: i) direct correction of the mutated nucleotide (i.e.,  
148 c.3631C>T) using sgRNA#1 (Pat1-sg1, hereafter) and ii) readthrough of the premature stop  
149 codon (PTC) using a method called CRISPR-pass,<sup>[21]</sup> which involved editing the neighboring  
150 sequences using sgRNA#2 (Pat1-sg2, hereafter) (**Figure 2A**). Using Pat1-sg1, correction of  
151 the pathogenic mutation at position 5 (counting from the 5' end of the target sequence) in the  
152 protospacer sequence would occur by conversion of adenine to guanine in the template strand,  
153 resulting in T-to-C correction on the coding strand. Using Pat1-sg2, the PTC (5'-TAG-3')  
154 caused by c.3631C>T can be converted to 5'-TGG-3', which will be translated to tryptophan  
155 (Trp), leading to restoration of the *COL7A1* reading frame. Because this amino acid change  
156 was predicted to have no deleterious effects on C7 (PROVEAN score < -2.5; PredictProtein  
157 score >50), we hypothesized that Pat1-sg2-induced PTC readthrough could contribute to C7  
158 restoration despite this amino acid change.

159 Pat1-derived fibroblasts were then transfected with the ABEmax-encoding plasmid and  
160 each sgRNA-encoding plasmid by electroporation and harvested after 3 to 7 days. Genomic  
161 DNA was isolated from the bulk population of cells and subjected to high-throughput

162 sequencing for the assessment of base editing outcomes. The sequencing results showed that,  
163 through strategy (i) using Pat1-sg1, the target T (T5) was efficiently converted to C at a  
164 frequency of 30.6%, whereas bystander Ts (T7 and T9) were also edited at frequencies of 44.5%  
165 and 5.5%, respectively (**Figure 2B** and **2C**). On the other hand, through strategy (ii) using Pat1-  
166 sg2, the target A (A6) and a bystander A (A8) were converted at frequencies of 24.6% and 1.8%,  
167 respectively (**Figure 2B** and **2C**). The frequencies of indels generated by ABE/Pat1-sg1 and  
168 ABE/Pat1-sg2 were 3.3% and 0.1%, respectively (**Figure 2C**). We further assessed the  
169 frequencies of *COL7A1* editing outcomes at the mRNA level using complementary DNAs  
170 (cDNAs). We found that the target sequences were edited at rates that were higher than that in  
171 genomic DNA, similar to findings from previous studies (**Figure 2D** and **S1A**).<sup>[15, 22]</sup>

172 Next, we evaluated C7 expression in ABE-treated RDEB fibroblasts from Pat1. Western  
173 blot analysis of bulk populations of such cells revealed the restoration of the full length C7  
174 protein, at levels that were up to 68% (Pat1-sg1) and 23% (Pat1-sg2) of the the level in normal  
175 human dermal fibroblasts (NHDFs), whereas uncorrected cells showed barely detectable C7  
176 protein (**Figure 2E**). The amount of C7 released into the culture supernatant of the RDEB  
177 fibroblasts was also increased following ABE treatment, to up to 19% (Pat1-sg1) and 22%  
178 (Pat1-sg2) of the levels seen in the NHDF supernatant (**Figure 2E**). Immunocytochemistry of  
179 C7 confirmed these findings and revealed increased C7 protein expression in the cytoplasm of  
180 ABE-treated RDEB fibroblasts (**Figure 2F**). It was previously reported that RDEB fibroblasts  
181 exhibited decreased adhesion ability due to C7 deficiency, and that viral vector-mediated  
182 transduction of the full-length human *COL7A1* gene restored their adhesion capacity.<sup>[23]</sup> Thus,  
183 we further evaluated the adhesion properties of the ABE-treated RDEB fibroblasts using a  
184 trypsin-based cell detachment assay. Whereas uncorrected RDEB fibroblasts showed poor cell  
185 adhesion, with 59%, 37%, and 19% of cells adhering at 1, 2, and 4 minutes after trypsin  
186 treatment compared to 92%, 51%, and 40% of NHDFs, ABE-treated RDEB fibroblasts (Pat1-  
187 sg1) showed a 21%, 15%, and 6% increase in cell adhesion at 2, 4, and 6 minutes compared to  
188 untreated RDEB fibroblasts (**Figure 2G**). We also tested the effect of *COL7A1* correction on  
189 the ability of RDEB fibroblasts to proliferate using a mitochondrial activity assay (WST-1  
190 assay). The RDEB fibroblasts showed lower rates of proliferation than did NHDFs, but ABE-  
191 treated RDEB fibroblasts showed enhanced cell proliferation compared to uncorrected cells  
192 (**Figure 2H**). Taken together, our results indicate that both ABE-mediated strategies, involving  
193 Pat1-sg1 and Pat1-sg2, are relevant for gene rescue in Pat1-derived cells.

194

### 195 **Prime editing for *COL7A1* gene correction in both Pat1- and Pat2-derived fibroblasts**

196 We next investigated the potential use of prime editing for correcting the two nonsense  
197 mutations (i.e., c.2005C>T and c.3631C>T) in the *COL7A1* gene. Because PEs have a more  
198 flexible targeting scope than BEs, we sought to apply PEs for correcting both mutations. In this  
199 experiment, we used the PE3 system because of its enhanced editing efficiency compared to  
200 that of PE2. We designed pegRNAs that could correct the nonsense mutation and also induce  
201 silent mutations in the PAM sequences, because it was previously reported that such mutations  
202 in the PAM enhance the editing efficiency and reduce indel generation by inhibiting repetitive

203 PE binding after the initial editing. We first used a pegRNA containing 13-nt PBS and 14-nt  
204 RTT together with a ngRNA. For Pat1, pegRNA#1 (Pat1-peg1, hereafter) was designed for the  
205 correction of c.3631C>T; a T-to-C conversion would occur at position +10 (10 nt downstream  
206 from the nick site) and the ngRNA would lead to the generation of a nick 60 nt downstream of  
207 the pegRNA-induced nick (**Figure 3A** and **S1B**). For Pat2, pegRNA#2 (Pat2-peg2, hereafter)  
208 was designed for the correction of c.2005C>T; in this case, a T-to-C conversion would occur  
209 at position +12 (12 nt downstream from the nick site) and the ngRNA would direct the  
210 formation of a nick in the non-edited strand at a position 56 nt upstream of the pegRNA-induced  
211 nick site (**Figure 3B** and **S1A**). Then, PE<sup>2</sup>-, pegRNA-, and ngRNA-encoding plasmids were  
212 transfected into Pat1- or Pat2-derived primary fibroblasts via electroporation. After 3 to 7 days,  
213 the cells were harvested for assessment of the editing efficiency. Genomic DNA from the bulk  
214 population of cells was subjected to high-throughput sequencing. The results showed that the  
215 average prime editing efficiencies were 10.5% at c.3631C>T with PE3/Pat1-peg1 (**Figure 3C**)  
216 and 5.2% at c.2005C>T with PE3/Pat2-peg2 (**Figure 3E**). The average indel frequencies were  
217 1.5% for PE3/Pat1-peg1 and 0.7% for PE3/Pat2-peg2 (**Figure 3E**). When we tested various  
218 pegRNAs with different PBS lengths (i.e., 11 nt and 15 nt), pegRNAs with a 13-nt PBS led to  
219 editing activity that was comparable to that seen with the other pegRNAs (**Figure 3E**).

220 To investigate whether correction of *COL7A1* by the PE3 system can restore functional C7  
221 in RDEB fibroblasts, we selected PE-treated fibroblasts derived from Pat1 because the editing  
222 efficiency was higher than that of PE-treated fibroblasts derived from Pat2. Similar to the above  
223 experiments using ABEs, we assessed the editing efficiency in cDNAs and found that the  
224 correction frequency in cDNAs was consistently higher than that in genomic DNA (**Figure 3F**  
225 and **S1C**). Western blot analysis showed that PE-treated RDEB fibroblasts expressed increased  
226 levels of the C7 protein, to up to 46% of the level in NHDFs (**Figure 3G**). In addition,  
227 immunocytochemistry confirmed efficient expression of the C7 protein in PE-treated RDEB  
228 fibroblasts, whereas the unedited cells showed no antibody reactivity (**Figure 3H**). We further  
229 evaluated the adhesion properties of the PE-treated RDEB fibroblasts by the trypsin-based cell  
230 detachment assay. PE-treated RDEB fibroblasts showed a 21%, 17%, and 7% increase in  
231 adhesion 2, 4, and 6 minutes after trypsin treatment compared to untreated RDEB fibroblasts,  
232 which showed poor cell adhesion (**Figure 3I**). We also tested the effect of *COL7A1* correction  
233 on the proliferation ability of RDEB fibroblasts using the WST-1 assay. RDEB fibroblasts  
234 carrying Q1211X and E2857X showed lower rates of proliferation than NHDFs, but PE-treated  
235 fibroblasts showed enhanced cell proliferation compared to uncorrected cells (**Figure 3J**).  
236 These findings indicate that *COL7A1* correction by PE can effectively rescue the impaired  
237 adhesion and proliferation properties of RDEB fibroblasts.

238

### 239 **Deposition of human type VII collagen at the DEJ of immunodeficient mice injected with** 240 **ABE-/PE-corrected RDEB fibroblasts**

241 Next, we investigated whether ABE-/PE-corrected RDEB fibroblasts could synthesize and  
242 secrete human C7 that would then localize correctly at the DEJ *in vivo* after intradermal  
243 injection into immunodeficient mice. To this end, a single dose of 5 x 10<sup>6</sup> NHDFs, non-edited

244 Pat1-derived RDEB fibroblasts, or Pat1-derived RDEB fibroblasts corrected using Pat1-sg1,  
245 Pat1-sg2, or Pat1-peg1 suspended in 150  $\mu$ l of phosphate-buffered saline was intradermally  
246 injected into the back skin of immunodeficient mice (**Figure 4A**). Two weeks after injection,  
247 human C7 protein deposition at the DEJ was analyzed by immunofluorescence using anti-  
248 human COL7 antibody (kindly provided by Dr Hiroaki Iwata, Hokkaido University Graduate  
249 School of Medicine). We found that skin injected with ABE-/PE-treated RDEB fibroblasts  
250 showed strong linear deposition of human C7 along the DEJ, whereas human C7 was barely  
251 detectable in skin injected with phosphate-buffered saline alone or uncorrected RDEB  
252 fibroblasts (**Figure 4B**). These observations clearly demonstrate that ABE- or PE-mediated  
253 correction of a *COL7A1* nonsense mutation functionally restores the expression and secretion  
254 of C7 in primary RDEB fibroblasts.

255 We also investigated whether off-target DNA editing occurred in Pat1-derived RDEB  
256 fibroblasts corrected using Pat1-sg1, Pat1-sg2, or Pat1-peg1. We carefully identified potential  
257 off-target sites using Cas-OFFinder software.<sup>[24]</sup> When up to three mismatched bases or one  
258 mismatched base with a DNA/RNA bulge were allowed, a total of six potential off-target sites  
259 for Pat1-sg1, no sites for Pat-sg2, and seven sites for Pat1-peg1 were identified. High-  
260 throughput sequencing revealed that no off-target editing was found in any of the cell  
261 populations (**Figure S2**).

262

## 263 DISCUSSION

264 Genome editing has emerged as a promising molecular approach for treating genetic  
265 diseases. In this study, we first established a *COL7A1* mutation database containing 69  
266 pathogenic mutations (40 variants without recurrence) from a total of 36 Korean RDEB patients.  
267 As a proof-of-concept, we chose two patients having two representative *COL7A1* mutations  
268 [i.e., c.3631C>T (Q1211X) and c.2005C>T (R669X)], which were formerly shown to cause  
269 generalized severe RDEB<sup>[18b, 19]</sup> and have been reported to result in nonsense-mediated mRNA  
270 decay that manifests as a complete absence of C7.<sup>[18]</sup> We first applied ABEs to correct the  
271 mutations in primary RDEB patient-derived fibroblasts through two different strategies: direct  
272 correction of target mutations to the wild-type sequence and induction of readthrough of a PTC  
273 with the CRISPR-pass method. After electroporation of the plasmid-based delivery system,  
274 ABEmax showed an editing efficacy (24.6~30.6% in genomic DNA and 37~58% at the mRNA  
275 level) comparable to that in previous work by Osborn et al. in which the ABEmax-induced  
276 gene correction rate was 8.2%~23.8% in genomic DNA and 17.8~45% at the mRNA level in  
277 primary RDEB fibroblasts.<sup>[15]</sup> In addition, ABEmax induced a low rate of indels (0.1~3.3%),  
278 similar to that in the previous research (1.5~1.9%),<sup>[15]</sup> suggesting a more reliable editing  
279 approach than HDR-mediated gene correction, which resulted in higher indel rates. This point  
280 is important because of DSB-associated safety issues.

281 However, BEs cannot be used to correct the disease-associated mutations in more than  
282 half of RDEB patients. Furthermore, we observed that the frequency of ABE-induced bystander  
283 edits varied over a wide range, with an upper value of 44.5% (1.8-44.5%), depending on the



284 width of the editing window. This effect might limit further applications of BEs for RDEB  
285 treatment. As a potential alternative, we next used PEs to correct the mutations. To the best of  
286 our knowledge, this study is the first to demonstrate the feasibility of PEs for correcting  
287 pathogenic *COL7A1* mutations, including a mutation that was not suitable for correction with  
288 an ABE recognizing the canonical SpCas9 PAM, to treat RDEB. Although the editing  
289 efficiencies of PE3 on the compound heterozygous Q1211X (10.5%) and R669X (5.2%) targets  
290 in primary RDEB patient-derived fibroblasts were overall lower than that of ABEs, PEs showed  
291 precise base correction with few bystander edits. In addition, PE3 did not induce detectable  
292 off-target editing at potential Cas9 off-target loci, consistent with previous observations.<sup>[16, 25]</sup>

293 We further found that correction of these two nonsense mutations by either ABE or PE  
294 restored the synthesis and secretion of full-length C7 in RDEB fibroblasts. ABE- and PE-  
295 mediated genetic correction also rescued the poor adhesion capacity and growth potential of  
296 RDEB fibroblasts. We ultimately observed that ABE- and PE-treated RDEB fibroblasts  
297 produced functional C7 that was correctly deposited into the DEJ at the site of injection into  
298 the skin of immunodeficient mice. It has been shown that C7 levels that are 35% of that in  
299 NHDFs are sufficient to provide mechanical stability of the skin in a DEB hypomorphic murine  
300 model.<sup>[26]</sup> In this study, ABE- and PE-mediated correction of Q1211X in RDEB fibroblasts  
301 respectively restored the production of full-length C7 to levels of up to 68% and 46% of that  
302 in NHDFs; furthermore, the C7 was correctly deposited along the DEJ of the immunodeficient  
303 mouse skin. Edited RDEB fibroblasts showed enhanced proliferation compared to non-edited  
304 cells, which may explain why the levels of C7 restoration are higher than would be expected  
305 from the editing frequency at the genomic DNA level.

306 Collectively, our data demonstrate that both ABEs and PEs enable efficient correction of  
307 pathogenic *COL7A1* mutations with higher ratios of the desired edit per indel than HDR in  
308 patient-derived primary cells, restore C7 expression to levels known to rescue the phenotype  
309 of the DEB murine model, and induce the formation of functional C7 that incorporates into the  
310 DEJ of immunodeficient mice. By using a non-viral delivery method, electroporation, we  
311 minimize safety concerns for therapeutic translation of these editing technologies to treat  
312 RDEB. Despite the higher editing efficacy of ABEs compared to PEs for correcting *COL7A1*  
313 nonsense mutations, PEs would be more reliable tools than ABEs for RDEB treatment,  
314 considering that PEs exhibit precise correction without bystander edits, the ability to target  
315 almost all pathogenic mutations, and negligible off-target editing effects. In the near future, we  
316 expect that BEs or PEs will be used for treating RDEB patients *via* the transplantation of *ex*  
317 *vivo* gene-corrected autologous cells.

318

## 319 **ACKNOWLEDGEMENTS**

320 This research was supported by grants from the National Research Foundation of Korea (NRF)  
321 no. 2021R1A2C3012908 and no. 2021M3A9H3015389 to S.B, and no. 2021R1A2C201370 to  
322 S.E.L.

323

324 **AUTHOR CONTRIBUTIONS**

325 S.B. and S.E.L. conceived this project; S.-E.K., S.-A.H., and A.-y.L. performed and analyzed  
326 the experiments; G.-H.H. performed bioinformatics analyses; J.H.K., H.I., and S.-C.K. gave  
327 critical comments; S.-A.H., S.B., and S.E.L. wrote the manuscript with the approval of all other  
328 authors.

329

330 **Additional information**

331 **Supplementary Information accompanying this paper is available at <http://>**

332

333 **Competing interests**

334 S.-A.H., S.-E.K., S.B. and S.E.L. are filing a patent application based on this work.

335

## 336 **Methods**

### 337 **Analysis of targetable disease mutations in *COL7A1***

338 RDEB-associated variants were collected from the *COL7A1* variants database  
339 (<http://www.col7a1-database.info>). The information of reference sequence and CDS position  
340 of each variant were obtained from the National Center for Biotechnology Information (NCBI)  
341 website (NG\_007065). The number of possible BE-targetable variants was calculated when the  
342 mutations were located within editing activity windows; 3<sup>rd</sup> to 9<sup>th</sup> positions counting from the  
343 5' end of the target sequence. The number of possible PE-mediated gene corrections was  
344 counted when distances between the mutations and Cas9-mediated nick sites were 12 bp or  
345 less. The analysis program was developed using using Python3.

346

### 347 **Establishment of a *COL7A1* mutation database specific for Korean RDEB patients**

348 RDEB patients from all regions of South Korea were referred to Gangnam Severance Hospital,  
349 Seoul, Korea, for molecular diagnosis. The results, which include information about 38 patients  
350 from 35 unrelated families, make up the largest Korean database for RDEB. RDEB was  
351 diagnosed based on clinical features, immunofluorescence antigen mapping and next-  
352 generation sequencing (NGS) and/or Sanger sequencing of *COL7A1*. All participants or their  
353 legal guardians gave their written informed consent, and this study was approved by the  
354 Institutional Review Board (IRB) at Gangnam Severance Hospital in accordance with the  
355 principles of the Declaration of Helsinki. Genomic DNA was extracted from peripheral blood  
356 lymphocytes from patients. DNA from five families was analyzed by NGS, and DNA from 30  
357 families was analyzed by traditional Sanger sequencing. All 118 *COL7A1* exons and exon-  
358 intron borders were amplified by polymerase chain reaction (PCR) and the products were  
359 subsequently sequenced. For all mutations other than nonsense mutations, 100 control alleles  
360 were studied to rule out the possibility that the putative disease-associated mutation might be  
361 a frequent polymorphism.

362

### 363 **Study approval and human subjects**

364 Two patients with RDEB carrying compound heterozygous *COL7A1* mutations (c.3631C>T,  
365 p.Q1211X, exon 27 and c.8569G>T, p.E2857X, exon 116 in patient 1; c.2005C>T, p.R669X,  
366 exon 15 and c.8569G>T, p.E2857X, exon 116 in patient 2) were enrolled in this study approved  
367 by the Gangnam Severance Hospital IRB (no. 3-2021-0485). Declaration of Helsinki protocols  
368 were followed, and both subjects gave written informed consent for the donation of skin cells.

369

### 370 **Isolation and culture of primary cells from patients with RDEB**

371 Skin samples from the RDEB patients, which were obtained by 3-mm punch biopsies, were  
372 dissected into 10 pieces with sharp scalpels. For skin explant culture, the pieces were placed in  
373 and attached to the well of a 100-mm dish and maintained at 37°C with 5% CO<sub>2</sub> in Dulbecco's

374 modified Eagle medium (DMEM), supplemented with 10% fetal bovine serum (FBS) and 1%  
375 penicillin/streptomycin (P/S). After 1 week, the medium was changed to Keratinocyte-SFM  
376 medium (Thermo Fisher Scientific) supplemented with 1% P/S for keratinocyte culture and  
377 DMEM supplemented with 10% FBS and 1% P/S for fibroblasts. Primary human keratinocytes  
378 and fibroblasts were cryopreserved at the second passage and stored at -80°C until use.

379

### 380 **Sanger sequencing**

381 Genomic DNA was extracted from patient blood samples using Exgene™ Blood SV mini  
382 (GeneAll, Seoul, South Korea). The *COL7A1* gene was amplified by PCR using targeted  
383 primers (**Table S2**).

384

### 385 **Immunofluorescence for C7 in human skin\**

386 Frozen skin tissues from a normal individual and the patients were sectioned at 6 µm and  
387 stained with mouse monoclonal anti-NC1 C7 antibody (clone LH 7.2; Sigma-Aldrich) at a  
388 1:1000 dilution. Alexa Fluor 488 conjugated rabbit anti mouse IgG (Thermo Fisher Scientific)  
389 was used as secondary antibody. Sections were stained with 4,6-diamidino-2-phenylindole  
390 (DAPI) (Thermo Fisher Scientific). Images were captured using an LSM 780 confocal  
391 microscope (Carl Zeiss, Oberkochen, Germany).

392

### 393 **Western blots**

394 Total proteins from primary fibroblasts were isolated using RIPA buffer (Cell Signaling  
395 Technology, Danvers, MA) supplemented with 1 mM phenylmethylsulfonyl fluoride (PMSF).  
396 The fibroblast culture supernatants were mixed with acetone and centrifuged at 4000 rpm for  
397 20 minutes, after which the resulting pellets were washed with phosphate-buffered saline. Total  
398 proteins from these supernatant-derived pellets were isolated using RIPA buffer (Cell Signaling  
399 Technology, Danvers, MA) supplemented with 1 mM PMSF. After protein isolation, equal  
400 amounts of proteins from each group were loaded onto Nupage Novex Bis-Tris Gels (Thermo  
401 Fisher Scientific), and electrophoresis was performed using an X-cell SureLock Mini-Cell  
402 (Thermo Fisher Scientific). After electrophoresis, proteins were transferred onto  
403 polyvinylidene difluoride membranes, which were then incubated with rabbit polyclonal anti-  
404 collagen VII antibody (ab93350; Abcam) that was diluted in Tris-buffered saline (TBS)  
405 containing 0.05% Tween 20 (TBS-T), at a dilution of 1:1000. Blots were washed with 0.05%  
406 TBS-T and then incubated with horseradish peroxidase-conjugated anti-mouse and anti-rabbit  
407 secondary antibodies (Thermo Fisher Scientific) in 0.05% TBS-T at a dilution of 1:2000. Blots  
408 were developed using ECL PLUS reagent (Pierce, Rockford, IL). The densities of the resulting  
409 protein bands were analyzed using ImageJ densitometry software (National Institutes of Health,  
410 Bethesda, MD).

411

## 412 **Immunocytochemistry**

413 For immunocytochemistry, fibroblasts were cultured in chamber slides (LabTek, Thermo  
414 Fisher Scientific), fixed with 4% paraformaldehyde for 10 minutes, blocked with 0.5% bovine  
415 serum albumin for 30 minutes, and then incubated with rabbit polyclonal anti-collagen VII  
416 antibody (ab93350; Abcam; 1000-fold dilution) overnight at 4°C. After washing, cells were  
417 incubated with Alexa Fluor 488-conjugated rabbit anti-mouse IgG (Thermo Fisher Scientific)  
418 as the secondary antibody at a 1:2000 dilution and DAPI (Thermo Fisher Scientific). Images  
419 were captured using an LSM 780 confocal microscope (Carl Zeiss, Oberkochen, Germany).

420

## 421 **Intradermal injection of RDEB fibroblasts into immunodeficient mice**

422 All animal experiments were approved by the Animal Care Committee of Yonsei University  
423 College of Medicine. Male athymic nude mice (nu/nu) (Central Lab Animal Inc., Seoul, Korea)  
424 were maintained under specific pathogen-free conditions with water, food, and supportive  
425 nutrition ad libitum. Three fibroblast populations (NHDFs, RDEB fibroblasts, and ABE- and  
426 PE-treated RDEB fibroblasts) were expanded to obtain the required number of cells for  
427 intradermal injections. Then, cells were harvested using Trypsin/ethylenediaminetetraacetic  
428 acid (EDTA) (Life Technologies), after which they were washed gently three times with  
429 phosphate-buffered saline. Five million of each fibroblast type were resuspended in 150 µl of  
430 phosphate-buffered saline and were intradermally injected with a 24 G needle in a 1 cm<sup>2</sup> area.  
431 A single 150 µl volume was delivered via two injections of 75 µl. Three mice were injected per  
432 group. Two weeks after injection, mouse skin samples were obtained for immunofluorescence  
433 staining for human C7.

434

## 435 **Immunofluorescence staining of mouse skin**

436 For immunofluorescence detection of human C7 in injected mouse skin, frozen skin tissues  
437 were sectioned at 6 µm and stained with polyclonal rabbit anti-COL7 antibody (anti-FNIII7-  
438 FNIII8 antibody, kindly provided by Dr. Hiroaki Iwata, Department of Dermatology, Hokkaido  
439 University Graduate School of Medicine, Sapporo, Japan), at a dilution of 1:1000 at 4°C  
440 overnight. Alexa Fluor 488-conjugated rabbit anti-mouse IgG (Thermo Fisher Scientific) was  
441 used as the secondary antibody. Sections were stained with DAPI (Thermo Fisher Scientific).  
442 Images were captured using an LSM 780 confocal microscope (Carl Zeiss, Oberkochen,  
443 Germany).

444

## 445 **Cell detachment assay**

446 Fibroblasts were seeded at a density of  $6 \times 10^4$  cells/well in a 96-well plate and cultured for 24  
447 hours. After washing with 1X phosphate-buffered saline, confluent layers of fibroblasts were  
448 treated with 0.05% trypsin/EDTA for 6, 4, 2, 1, and 0 minutes, followed by washing once with  
449 10% FBS/DMEM to inactivate trypsin and then twice with phosphate-buffered saline. The  
450 adherent cells were stained with 0.5% crystal-violet (Sigma Aldrich) for 30 minutes and lysed

451 with 1% sodium dodecyl sulfate (Sigma Aldrich). The percentage of adherent cells was  
452 determined by measuring the absorbance at 590 nm using a spectrophotometer.

453

#### 454 **Proliferation assay**

455 NHDFs, unedited RDEB fibroblasts, and corrected RDEB fibroblasts were seeded at a  
456 concentration of  $5 \times 10^3$  cells/well into microplates (tissue culture grade, 96 wells, flat bottom)  
457 in 100  $\mu$ l 10% FBS/DMEM culture medium per well. 24 hours, 48 hours, or 72 hours after  
458 incubation at 37°C with 5% CO<sub>2</sub>, cellular proliferation was evaluated using a WST-1 assay  
459 (05015944001, Roche, Basel, Switzerland). Briefly, the cells were incubated with the WST-1  
460 reagent for 4 hours, and absorbance at 450 nm and 650 nm (reference wavelength) was detected  
461 using a microplate reader (iMark, Bio-Rad).

462

#### 463 **Construction of sgRNA- and pegRNA-expressing plasmids**

464 The target sequences were selected using Cas-designer ([http://www.rgenome.net/cas-](http://www.rgenome.net/cas-designer/)  
465 [designer/](http://www.rgenome.net/cas-designer/)).<sup>[27]</sup> To construct sgRNA- and ngRNA-expressing plasmids, complementary oligos  
466 representing target sequences were annealed and cloned into pRG2 (Addgene #104174). To  
467 construct pegRNA-expressing plasmids, complementary oligos representing target sequences,  
468 the sgRNA scaffold, and 3' extensions were annealed and cloned into pU6-pegRNA-GG-  
469 acceptor (Addgene #132777). The oligos are listed in **Table S3**.

470

#### 471 **Transfection**

472 Electroporation was performed using a Neon Transfection System (Thermo Fisher) with the  
473 following parameters: voltage, 1,650; width, 10ms; number, 3. For base editing, 150,000  
474 patient-derived fibroblasts were transfected with 900 ng of ABEmax-encoding plasmid  
475 (Addgene, #112095). For prime editing, 150,000 patient-derived fibroblasts were transfected  
476 with 900 ng of PE2-encoding plasmid (Addgene #132775), 300 ng of pegRNA-encoding  
477 plasmid, and 83 ng of ngRNA-encoding plasmid.

478

#### 479 **Cell lysis and high-throughput sequencing**

480 Cell pellets were resuspended in Proteinase K extraction buffer [40 mM Tris-HCl (pH 8.0)  
481 (Sigma), 1% Tween 20 (Sigma), 0.2 mM EDTA (Sigma), 10 mg of Proteinase K, 0.2% nonidet  
482 P-40 (VWR Life Science)] and then incubated at 60°C for 15 minutes and 98°C for 5 minutes.  
483 1~3  $\mu$ L of Proteinase K extraction solution containing genomic DNA was amplified for high-  
484 throughput sequencing. ABE and PE target sites were amplified using SUN-PCR blend (Sun  
485 Genetics). The PCR products were purified using Expin™ PCR SV mini (GeneAll) and  
486 sequenced using a MiniSeq Sequencing System (Illumina). The results were analyzed using  
487 Cas-Analyzer (<http://www.rgenome.net/cas-analyzer/>), BE-Analyzer

488 (<http://www.rgenome.net/be-analyzer/>), and PE-analyzer ([http://www.rgenome.net/pe-](http://www.rgenome.net/pe-analyzer/)  
489 [analyzer/](http://www.rgenome.net/pe-analyzer/)).<sup>[28]</sup> The primers are listed in **Table S2**.

490

#### 491 **Data Availability**

492 High-throughput sequencing data have been deposited in the NCBI Sequence Read Archive  
493 database (SRA; <https://www.ncbi.nlm.nih.gov/sra>) under accession number PRJNA739484.

494

#### 495 **Code availability.**

496 The authors declare that all unreported custom Python code used in this study is available from  
497 the corresponding author upon reasonable request.

498

499

500 **REFERENCES**

- 501 [1] a) A. Bardhan, L. Bruckner-Tuderman, I. L. C. Chapple, J. D. Fine, N. Harper, C. Has, T.  
502 M. Magin, M. P. Marinkovich, J. F. Marshall, J. A. McGrath, J. E. Mellerio, R. Polson, A.  
503 H. Heagerty, *Nat Rev Dis Primers* **2020**, *6*, 78; b) C. Has, J. W. Bauer, C. Bodemer, M. C.  
504 Bolling, L. Bruckner-Tuderman, A. Diem, J. D. Fine, A. Heagerty, A. Hovnanian, M. P.  
505 Marinkovich, A. E. Martinez, J. A. McGrath, C. Moss, D. F. Murrell, F. Palisson, A.  
506 Schwieger-Briel, E. Sprecher, K. Tamai, J. Uitto, D. T. Woodley, G. Zambruno, J. E.  
507 Mellerio, *Br. J. Dermatol.* **2020**, *183*, 614.
- 508 [2] X. Wang, P. Ghasri, M. Amir, B. Hwang, Y. Hou, M. Khalili, A. Lin, D. Keene, J. Uitto,  
509 D. T. Woodley, M. Chen, *Mol. Ther.* **2013**, *21*, 1335.
- 510 [3] a) A. Nystrom, K. Thriene, V. Mittapalli, J. S. Kern, D. Kiritsi, J. Dengjel, L. Bruckner-  
511 Tuderman, *EMBO Mol. Med.* **2015**, *7*, 1211; b) K. Tamai, T. Yamazaki, T. Chino, M. Ishii,  
512 S. Otsuru, Y. Kikuchi, S. Iinuma, K. Saga, K. Nimura, T. Shimbo, N. Umegaki, I.  
513 Katayama, J. Miyazaki, J. Takeda, J. A. McGrath, J. Uitto, Y. Kaneda, *Proc. Natl. Acad.*  
514 *Sci. U. S. A.* **2011**, *108*, 6609.
- 515 [4] a) T. Wong, L. Gammon, L. Liu, J. E. Mellerio, P. J. Dopping-Hepenstal, J. Pacy, G. Elia,  
516 R. Jeffery, I. M. Leigh, H. Navsaria, J. A. McGrath, *J. Invest. Dermatol.* **2008**, *128*, 2179;  
517 b) G. Petrof, M. Martinez-Queipo, J. E. Mellerio, P. Kemp, J. A. McGrath, *Br. J. Dermatol.*  
518 **2013**, *169*, 1025.
- 519 [5] a) P. Conget, F. Rodriguez, S. Kramer, C. Allers, V. Simon, F. Palisson, S. Gonzalez, M.  
520 J. Yubero, *Cytotherapy* **2010**, *12*, 429; b) G. Petrof, S. M. Lwin, M. Martinez-Queipo, A.  
521 Abdul-Wahab, S. Tso, J. E. Mellerio, I. Slaper-Cortenbach, J. J. Boelens, J. Tolar, P. Veys,  
522 M. Ofuya, J. L. Peacock, A. E. Martinez, J. A. McGrath, *J. Invest. Dermatol.* **2015**, *135*,  
523 2319; c) E. Rashidghamat, T. Kadiyirire, S. Ayis, G. Petrof, L. Liu, V. Pullabhatla, C.  
524 Ainali, A. Guy, S. Aristodemou, J. R. McMillan, L. Ozoemena, J. Mee, R. Pramanik, A.  
525 Saxena, R. Nuamah, E. de Rinaldis, S. Serrano, C. Maurin, M. Martinez-Queipo, S. M.  
526 Lwin, D. Ilic, A. Martinez, F. Dazzi, I. Slaper-Cortenbach, K. Westinga, S. Zeddies, M.  
527 van den Broek, A. Onoufriadis, J. E. Mellerio, J. A. McGrath, *J. Am. Acad. Dermatol.*  
528 **2020**, *83*, 447; d) S. E. Lee, S. J. Lee, S. E. Kim, K. Kim, B. Cho, K. Roh, S. C. Kim, *JCI*  
529 *Insight* **2021**, *6*.
- 530 [6] J. E. Wagner, A. Ishida-Yamamoto, J. A. McGrath, M. Hordinsky, D. R. Keene, D. T.  
531 Woodley, M. Chen, M. J. Riddle, M. J. Osborn, T. Lund, M. Dolan, B. R. Blazar, J. Tolar,  
532 *N. Engl. J. Med.* **2010**, *363*, 629.
- 533 [7] a) Z. Siprashvili, N. T. Nguyen, E. S. Gorell, K. Loutit, P. Khuu, L. K. Furukawa, H. P.  
534 Lorenz, T. H. Leung, D. R. Keene, K. E. Rieger, P. Khavari, A. T. Lane, J. Y. Tang, M. P.  
535 Marinkovich, *JAMA* **2016**, *316*, 1808; b) S. Eichstadt, M. Barriga, A. Ponakala, C. Teng,  
536 N. T. Nguyen, Z. Siprashvili, J. Nazaroff, E. S. Gorell, A. S. Chiou, L. Taylor, P. Khuu, D.  
537 R. Keene, K. Rieger, R. K. Khosla, L. K. Furukawa, H. P. Lorenz, M. P. Marinkovich, J.  
538 Y. Tang, *JCI Insight* **2019**, *4*; c) S. M. Lwin, F. Syed, W. L. Di, T. Kadiyirire, L. Liu, A.  
539 Guy, A. Petrova, A. Abdul-Wahab, F. Reid, R. Phillips, M. Elstad, C. Georgiadis, S.  
540 Aristodemou, P. A. Lovell, J. R. McMillan, J. Mee, S. Miskinyte, M. Titeux, L. Ozoemena,  
541 R. Pramanik, S. Serrano, R. Rowles, C. Maurin, E. Orrin, M. Martinez-Queipo, E.  
542 Rashidghamat, C. Tziotzios, A. Onoufriadis, M. Chen, L. Chan, F. Farzaneh, M. Del Rio,  
543 J. Tolar, J. W. Bauer, F. Larcher, M. N. Antoniou, A. Hovnanian, A. J. Thrasher, J. E.  
544 Mellerio, W. Qasim, J. A. McGrath, *JCI Insight* **2019**, *4*.
- 545 [8] a) S. Hainzl, P. Peking, T. Kocher, E. M. Murauer, F. Larcher, M. Del Rio, B. Duarte, M.  
546 Steiner, A. Klaussegger, J. W. Bauer, J. Reichelt, U. Koller, *Mol. Ther.* **2017**, *25*, 2573; b)  
547 A. Izmiryan, C. Ganier, M. Bovolenta, A. Schmitt, F. Mavilio, A. Hovnanian, *Mol Ther*  
548 *Nucleic Acids* **2018**, *12*, 554; c) J. Jackow, Z. Guo, C. Hansen, H. E. Abaci, Y. S. Doucet,



- 549 J. U. Shin, R. Hayashi, D. DeLorenzo, Y. Kabata, S. Shinkuma, J. C. Salas-Alanis, A. M.  
550 Christiano, *Proc. Natl. Acad. Sci. U. S. A.* **2019**; d) J. Bonafont, A. Mencia, E. Chacon-  
551 Solano, W. Srifá, S. Vaidyanathan, R. Romano, M. Garcia, R. Hervas-Salcedo, L. Ugalde,  
552 B. Duarte, M. H. Porteus, M. Del Rio, F. Larcher, R. Murillas, *Mol. Ther.* **2021**, *29*, 2008;  
553 e) S. Takashima, S. Shinkuma, Y. Fujita, T. Nomura, H. Ujiie, K. Natsuga, H. Iwata, H.  
554 Nakamura, A. Vorobyev, R. Abe, H. Shimizu, *J. Invest. Dermatol.* **2019**, *139*, 1711; f) T.  
555 Kocher, O. P. March, J. Bischof, B. Liemberger, S. Hainzl, A. Klausegger, A. Hoog, D.  
556 Strunk, J. W. Bauer, U. Koller, *J. Invest. Dermatol.* **2020**, *140*, 1985; g) A. Mencia, C.  
557 Chamorro, J. Bonafont, B. Duarte, A. Holguin, N. Illera, S. G. Llames, M. J. Escamez, I.  
558 Hausser, M. Del Rio, F. Larcher, R. Murillas, *Mol Ther Nucleic Acids* **2018**, *11*, 68; h) C.  
559 Chamorro, A. Mencia, D. Almarza, B. Duarte, H. Buning, J. Sallach, I. Hausser, M. Del  
560 Rio, F. Larcher, R. Murillas, *Mol Ther Nucleic Acids* **2016**, *5*, e307; i) J. Bonafont, A.  
561 Mencia, M. Garcia, R. Torres, S. Rodriguez, M. Carretero, E. Chacon-Solano, S.  
562 Modamio-Hoybjor, L. Marinas, C. Leon, M. J. Escamez, I. Hausser, M. Del Rio, R.  
563 Murillas, F. Larcher, *Mol. Ther.* **2019**, *27*, 986.
- 564 [9] a) T. Gaj, C. A. Gersbach, C. F. Barbas, 3rd, *Trends Biotechnol.* **2013**, *31*, 397; b) H. K.  
565 Jang, B. Song, G. H. Hwang, S. Bae, *Exp. Mol. Med.* **2020**, *52*, 1016.
- 566 [10] a) M. Kosicki, K. Tomberg, A. Bradley, *Nat. Biotechnol.* **2018**, *36*, 765; b) H. Y. Shin, C.  
567 Wang, H. K. Lee, K. H. Yoo, X. Zeng, T. Kuhns, C. M. Yang, T. Mohr, C. Liu, L.  
568 Hennighausen, *Nat Commun* **2017**, *8*, 15464.
- 569 [11] a) E. Haapaniemi, S. Botla, J. Persson, B. Schmierer, J. Taipale, *Nat. Med.* **2018**, *24*, 927;  
570 b) R. J. Ihry, K. A. Worringer, M. R. Salick, E. Frias, D. Ho, K. Theriault, S. Kommineni,  
571 J. Chen, M. Sondey, C. Ye, R. Randhawa, T. Kulkarni, Z. Yang, G. McAllister, C. Russ, J.  
572 Reece-Hoyes, W. Forrester, G. R. Hoffman, R. Dolmetsch, A. Kaykas, *Nat. Med.* **2018**,  
573 *24*, 939.
- 574 [12] a) A. V. Anzalone, L. W. Koblan, D. R. Liu, *Nat. Biotechnol.* **2020**, *38*, 824; b) Y. K. Jeong,  
575 B. Song, S. Bae, *Mol. Ther.* **2020**, *28*, 1938; c) A. C. Chadwick, X. Wang, K. Musunuru,  
576 *Arterioscler. Thromb. Vasc. Biol.* **2017**, *37*, 1741; d) P. Liu, S. Q. Liang, C. Zheng, E.  
577 Mintzer, Y. G. Zhao, K. Ponniselvan, A. Mir, E. J. Sontheimer, G. Gao, T. R. Flotte, S.  
578 A. Wolfe, W. Xue, *Nat Commun* **2021**, *12*, 2121; e) S. M. Ryu, T. Koo, K. Kim, K. Lim,  
579 G. Baek, S. T. Kim, H. S. Kim, D. E. Kim, H. Lee, E. Chung, J. S. Kim, *Nat. Biotechnol.*  
580 **2018**, *36*, 536; f) Y. Kim, S. A. Hong, J. Yu, J. Eom, K. Jang, S. Yoon, D. H. Hong, D. Seo,  
581 S. N. Lee, J. S. Woo, J. Jeong, S. Bae, D. Choi, *Cell Stem Cell* **2021**.
- 582 [13] A. C. Komor, Y. B. Kim, M. S. Packer, J. A. Zuris, D. R. Liu, *Nature* **2016**, *533*, 420.
- 583 [14] N. M. Gaudelli, A. C. Komor, H. A. Rees, M. S. Packer, A. H. Badran, D. I. Bryson, D. R.  
584 Liu, *Nature* **2017**, *551*, 464.
- 585 [15] M. J. Osborn, G. A. Newby, A. N. McElroy, F. Knipping, S. C. Nielsen, M. J. Riddle, L.  
586 Xia, W. Chen, C. R. Eide, B. R. Webber, H. H. Wandall, S. Dabelsteen, B. R. Blazar, D.  
587 R. Liu, J. Tolar, *J. Invest. Dermatol.* **2020**, *140*, 338.
- 588 [16] A. V. Anzalone, P. B. Randolph, J. R. Davis, A. A. Sousa, L. W. Koblan, J. M. Levy, P. J.  
589 Chen, C. Wilson, G. A. Newby, A. Raguram, D. R. Liu, *Nature* **2019**, *576*, 149.
- 590 [17] H. Nishimasu, X. Shi, S. Ishiguro, L. Gao, S. Hirano, S. Okazaki, T. Noda, O. O.  
591 Abudayyeh, J. S. Gootenberg, H. Mori, S. Oura, B. Holmes, M. Tanaka, M. Seki, H.  
592 Hirano, H. Aburatani, R. Ishitani, M. Ikawa, N. Yachie, F. Zhang, O. Nureki, *Science* **2018**,  
593 *361*, 1259.
- 594 [18] a) N. Yonei, T. Ohtani, F. Furukawa, *J. Dermatol.* **2006**, *33*, 802; b) T. Murai, K. Tamai,  
595 H. Nakano, K. Hanada, I. Hashimoto, D. J. H. M. J. Sawamura, **2007**, *59*, 15.
- 596 [19] N. Dang, D. F. Murrell, *Exp. Dermatol.* **2008**, *17*, 553.
- 597 [20] L. W. Koblan, J. L. Doman, C. Wilson, J. M. Levy, T. Tay, G. A. Newby, J. P. Maianti, A.

- 598 Raguram, D. R. Liu, *Nat. Biotechnol.* **2018**, *36*, 843.
- 599 [21] C. Lee, D. Hyun Jo, G. H. Hwang, J. Yu, J. H. Kim, S. E. Park, J. S. Kim, J. H. Kim, S.  
600 Bae, *Mol. Ther.* **2019**, *27*, 1364.
- 601 [22] a) L. Villiger, H. M. Grisch-Chan, H. Lindsay, F. Ringnalda, C. B. Pogliano, G. Allegri,  
602 R. Fingerhut, J. Haberle, J. Matos, M. D. Robinson, B. Thony, G. Schwank, *Nat. Med.*  
603 **2018**, *24*, 1519; b) L. Yang, L. Wang, Y. Huo, X. Chen, S. Yin, Y. Hu, X. Zhang, R. Zheng,  
604 H. Geng, H. Han, X. Ma, M. Liu, H. Li, W. Yu, M. Liu, J. Wang, D. Li, *Mol. Ther.* **2020**,  
605 *28*, 1673; c) D. H. Jo, H.-K. Jang, C. S. Cho, J. H. Han, G. Ryu, Y. Jung, S. Bae, J. H. Kim,  
606 **2021**, 2021.01.07.425822.
- 607 [23] a) J. Jackow, M. Titeux, S. Portier, S. Charbonnier, C. Ganier, S. Gaucher, A. Hovnanian,  
608 *J. Invest. Dermatol.* **2016**, *136*, 1346; b) M. Chen, N. Kasahara, D. R. Keene, L. Chan, W.  
609 K. Hoeffler, D. Finlay, M. Barcova, P. M. Cannon, C. Mazurek, D. T. Woodley, *Nat. Genet.*  
610 **2002**, *32*, 670.
- 611 [24] a) S. Bae, J. Park, J. S. Kim, *Bioinformatics* **2014**, *30*, 1473; b) G. H. Hwang, J. S. Kim,  
612 S. Bae, *Methods Mol. Biol.* **2021**, *2162*, 23.
- 613 [25] I. F. Schene, I. P. Joore, R. Oka, M. Mokry, A. H. M. van Vugt, R. van Boxtel, H. P. J. van  
614 der Doef, L. J. W. van der Laan, M. M. A. Verstegen, P. M. van Hasselt, E. E. S.  
615 Nieuwenhuis, S. A. Fuchs, *Nat Commun* **2020**, *11*, 5352.
- 616 [26] J. S. Kern, S. Loeckermann, A. Fritsch, I. Hausser, W. Roth, T. M. Magin, C. Mack, M. L.  
617 Muller, O. Paul, P. Ruther, L. Bruckner-Tuderman, *Mol. Ther.* **2009**, *17*, 1605.
- 618 [27] J. Park, S. Bae, J. S. Kim, *Bioinformatics* **2015**, *31*, 4014.
- 619 [28] a) J. Park, K. Lim, J. S. Kim, S. Bae, *Bioinformatics* **2017**, *33*, 286; b) G. H. Hwang, J.  
620 Park, K. Lim, S. Kim, J. Yu, E. Yu, S. T. Kim, R. Eils, J. S. Kim, S. Bae, *BMC*  
621 *Bioinformatics* **2018**, *19*, 542; c) G. H. Hwang, Y. K. Jeong, O. Habib, S. A. Hong, K. Lim,  
622 J. S. Kim, S. Bae, *Nucleic Acids Res.* **2021**, *49*, W499; d) G.-H. Hwang, B. Song, S. J. G.  
623 Bae, G. Editing, **2021**, 100004.
- 624

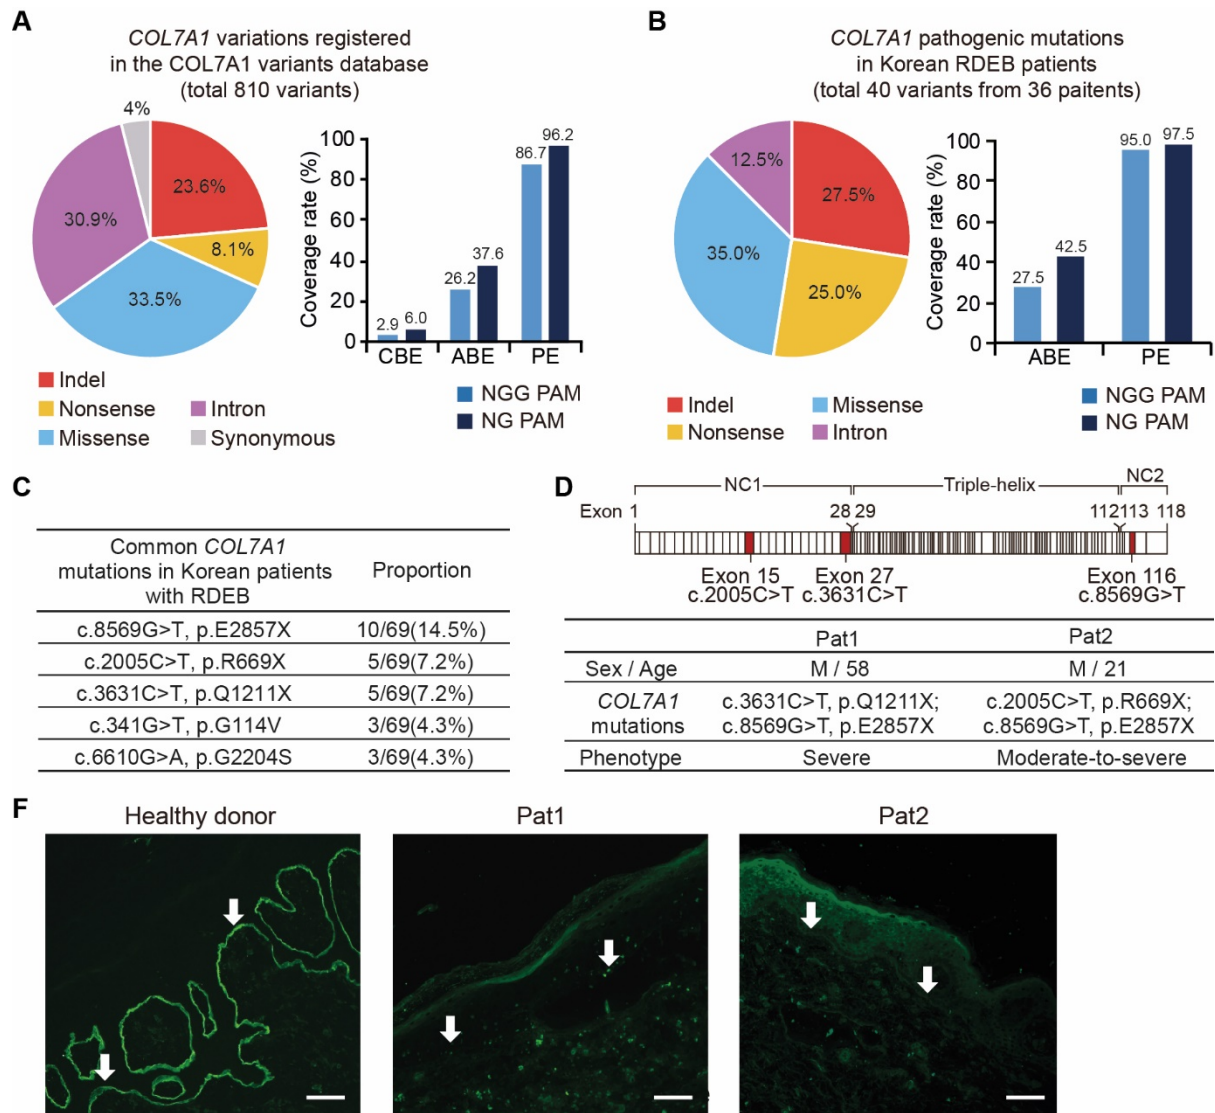

625

626

627 **Figure 1. Establishment of a COL7A1 mutation database specific for Korean RDEB**

628 **patients and analysis of Korean and world-wide databases.** (a) The full spectrum of

629 pathogenic COL7A1 mutations reported to date in DEB patients. Frequencies (%) of COL7A1

630 alleles that can theoretically be corrected with CBE, ABE, and PE constructed with SpCas9

631 (NGG-PAM) or its variant with a relaxed PAM requirement (NG-PAM). (b) Mutational

632 analysis of COL7A1 in a large cohort of Korean RDEB patients. Frequencies (%) of COL7A1

633 alleles that can theoretically be corrected with ABE and PE recognizing NGG- or NG-PAMs.

634 (c) The five most frequent pathogenic COL7A1 mutations in our database among the 36 Korean

635 RDEB patients with 69 pathogenic mutations. (d) Information about the two RDEB patients

636 enrolled in this study and a schematic representation of procollagen VII showing the locations

637 of the COL7A1 mutations identified in these patients. (e) Immunofluorescence to visualize C7

638 was performed on skin samples from Pat1, Pat2, and healthy controls using polyclonal rabbit

639 anti-COL7 antibody. White arrows point at the DEJ. Representative images are shown. Scale bars

represent 50 μm.

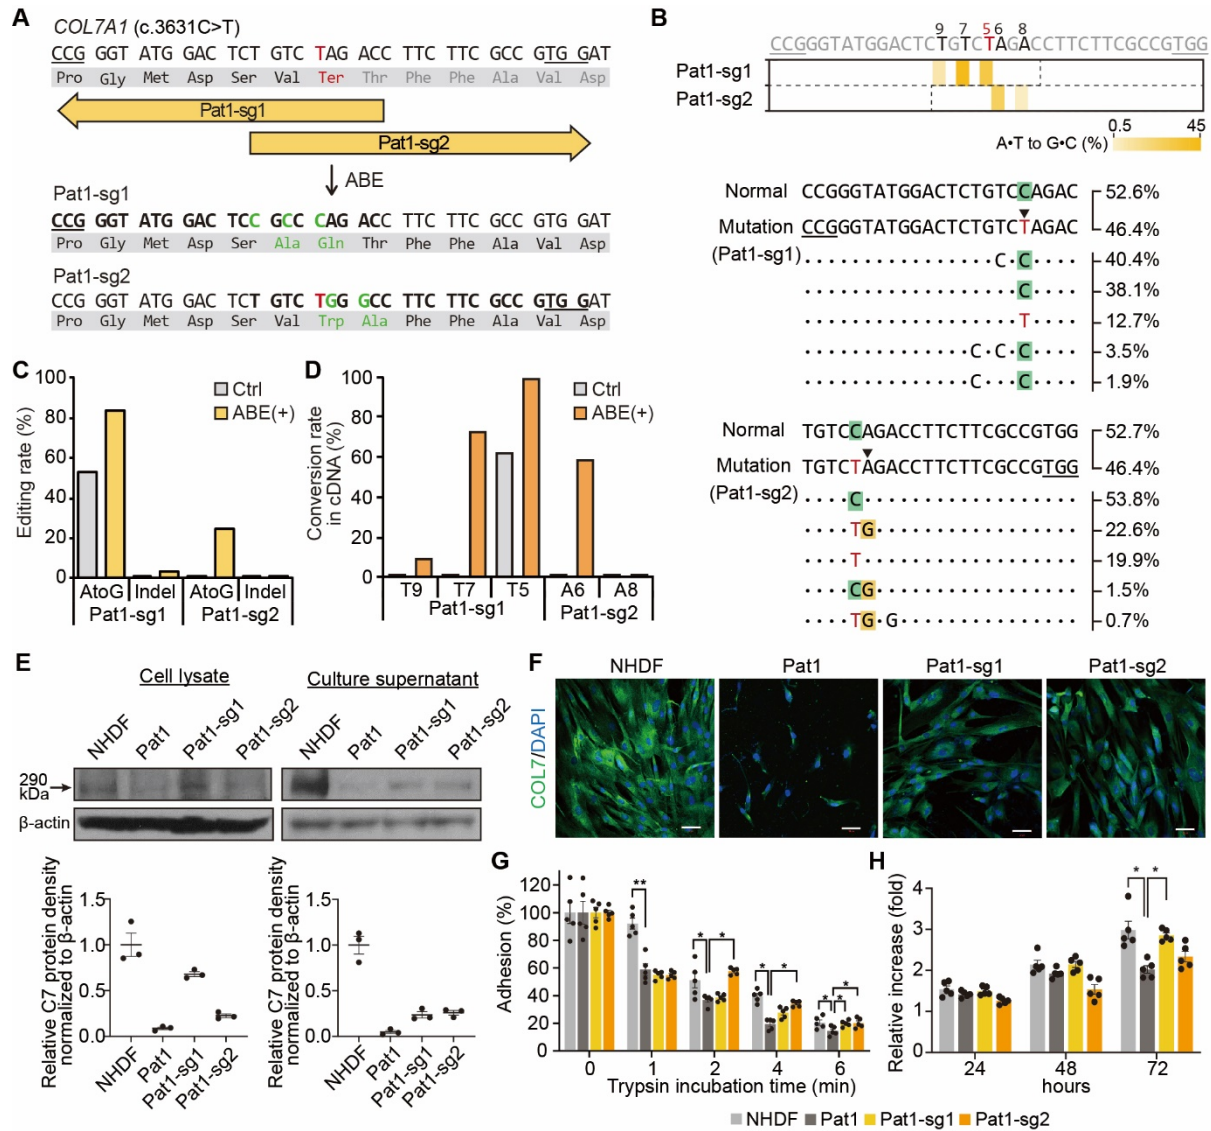

640

641 **Figure 2. Correction of c.3631C>T (Q1211X) in COL7A1 using ABEs in primary RDEB**  
 642 **fibroblasts.** (a) Schematic diagram of the ABE target sequence in exon 27 of the COL7A1 gene  
 643 containing a C>T nonsense mutation (c.3631C>T, p.Q1211X). The mutant sequence is shown  
 644 in red. Target sequences are highlighted in bold type, and PAM sequences are underlined. A•T  
 645 to G•C conversions in the ABE editing window are shown in green. (b) Heatmap visualizing  
 646 A•T to G•C conversion rates analyzed by high-throughput sequencing (top) and the sequences  
 647 at the target sites together with their proportions (middle and bottom). The five most common  
 648 sequences in ABE-treated RDEB fibroblasts are shown, and the frequencies of normal and  
 649 mutated alleles in the non-edited patient-derived fibroblasts are shown at the top of the panel.  
 650 PAM sequences are underlined, and the target A•T is indicated by an arrowhead. (c, d).  
 651 Conversion rates calculated by deep sequencing of genomic DNA (c) and mRNA (d) from  
 652 RDEB fibroblasts treated with different sgRNAs. (e) Western blots to measure C7 abundance  
 653 in cell lysates and culture supernatants using β-actin as an internal control. Protein band  
 654 densities from three independent experiments are presented as bar graphs. Each density value  
 655 was normalized to the β-actin value and expressed relative to the value in NHDFs. Data are  
 656 mean ± SEM. (f) Immunofluorescence staining to visualize the C7 protein (green) in NHDFs,

657 non-edited RDEB fibroblasts from Pat1, and ABE-treated RDEB fibroblasts. Nuclei were  
658 stained with DAPI (blue). Scale bars, 50  $\mu$ m. (g) Trypsin-based cell detachment assay. Cell  
659 adhesion is represented as the percentage of cells that remain attached after the indicated period  
660 of trypsin treatment. Five independent experiments were performed. Data are mean  $\pm$  SEM. \*P  
661 < 0.05, \*\*P < 0.01. (h) The proliferation of NHDFs, non-edited fibroblasts from Pat1, and  
662 ABE-treated RDEB fibroblasts was evaluated by the WST-1 assay. The ratio of the absorbance  
663 at 24, 48, and 72 hours to that at 0 hours is shown. Five independent experiments were  
664 performed. Data are mean  $\pm$  SEM. \*P < 0.05, \*\*P < 0.01.

665

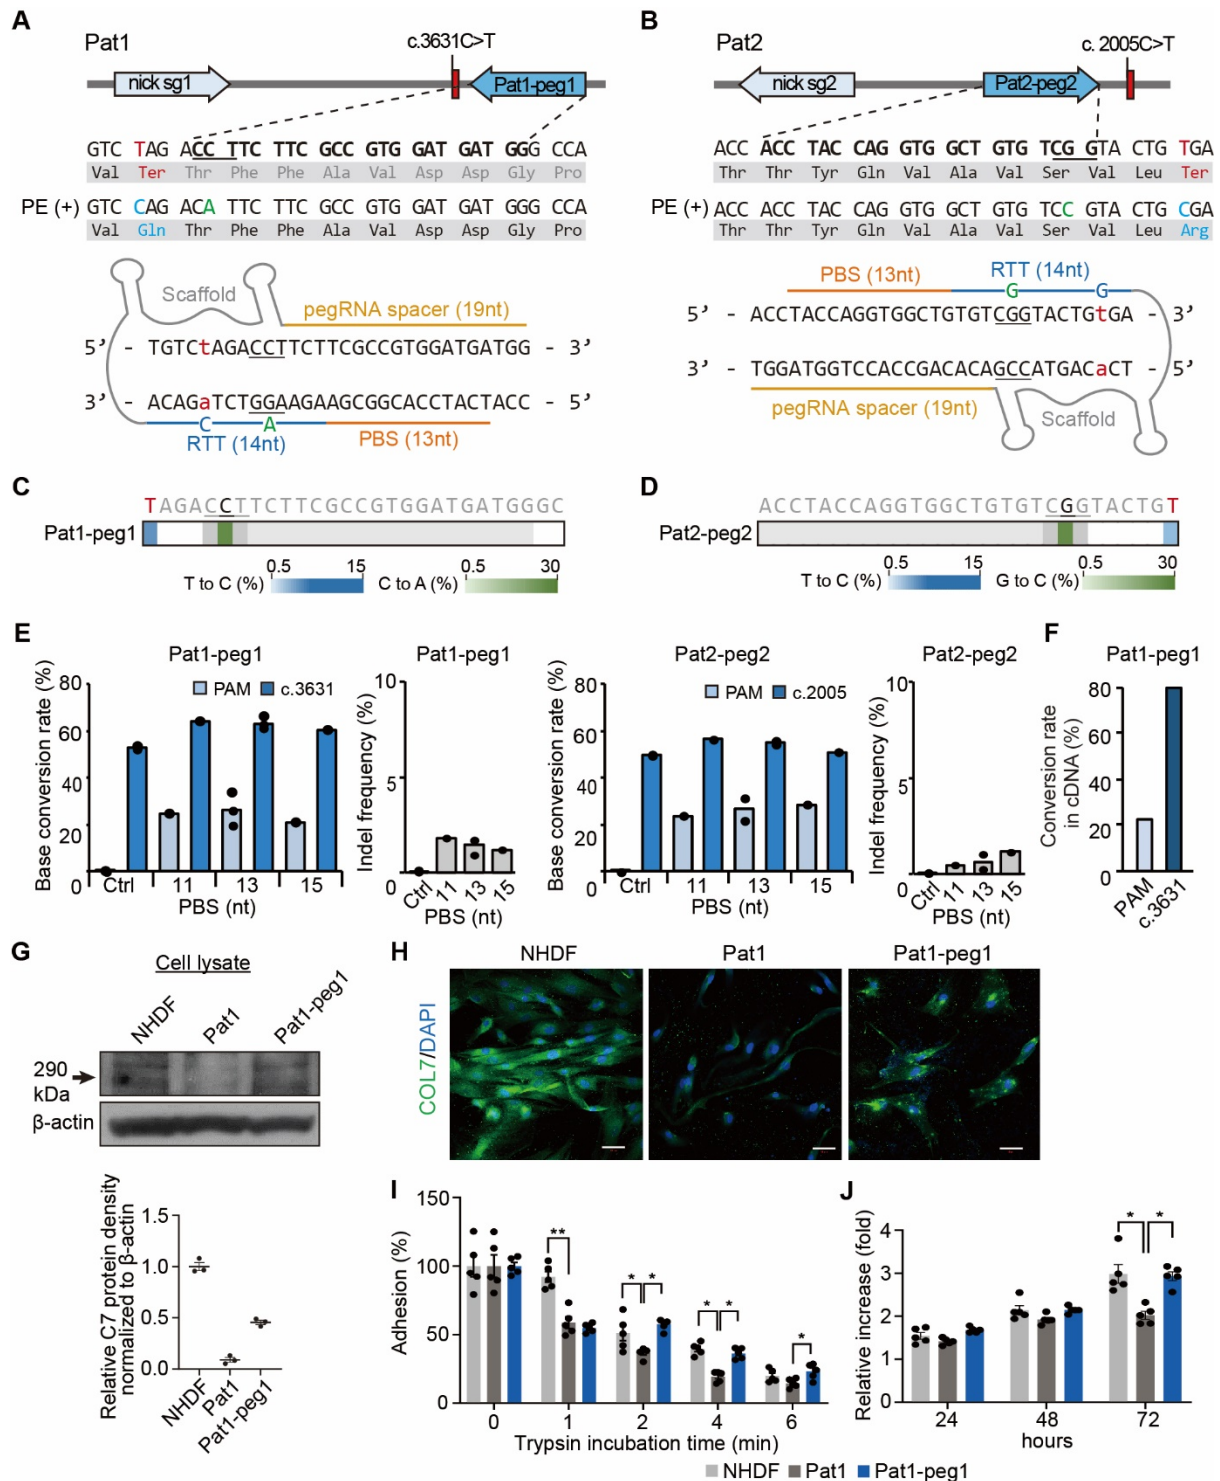

666

667

668

669

670

671

672

673

**Figure 3. PE3-mediated correction of c.3631C>T (Q1211X) and c.2005C>T (R669X) COL7A1 in primary fibroblasts derived from two RDEB patients.** (a, b) Schematic diagram of the pegRNA and ngRNA target sites in the COL7A1 gene in Pat1 (a) and Pat2 (b). Target sequences are highlighted in bold type, and PAM sequences are underlined. The pathogenic mutations, converted pathogenic mutations, and synonymous mutations for PAM disruption are shown in red, blue, and green, respectively (top). A 14-nt RTT and a 13-nt PBS were used for pegRNAs (bottom). (c, d) Heatmaps visualizing conversion rates determined by high-

674 throughput sequencing. (e) Prime editing efficiencies and indel frequencies in the target  
675 sequence in the patient-derived fibroblasts transfected with various pegRNAs with different  
676 PBS lengths ( $n = 1\sim 3$ ). (f) Conversion rates in mRNA from PE-treated RDEB fibroblasts. (g)  
677 Western blot to measure C7 abundance in cell lysates and culture supernatants using  $\beta$ -actin as  
678 an internal control. Protein band densities from three independent experiments are presented  
679 as bar graphs. Each density value was normalized to the  $\beta$ -actin value and expressed relative  
680 to the value in NHDFs. Data are mean  $\pm$  SEM. (h) Immunofluorescence staining to visualize  
681 the C7 protein (green) in NHDFs, non-edited RDEB fibroblasts from Pat1, and PE3-treated  
682 RDEB fibroblasts. Nuclei were stained with DAPI (blue). Scale bars, 50  $\mu$ m. (i) Trypsin-based  
683 cell detachment assay. Cell adhesion is represented as the percentage of cells that remain  
684 attached after the indicated period of trypsin treatment. Five independent experiments were  
685 performed. Data are mean  $\pm$  SEM. \* $P < 0.05$ , \*\* $P < 0.01$ . (j) The proliferation of NHDFs, non-  
686 edited fibroblasts from Pat1, and PE3-treated RDEB fibroblasts was evaluated by the WST-1  
687 assay. The ratio of the absorbance at 24, 48, and 72 hours to that at 0 hours is shown. Five  
688 independent experiments were performed. Data are mean  $\pm$  SEM. \* $P < 0.05$ , \*\* $P < 0.01$ .

689

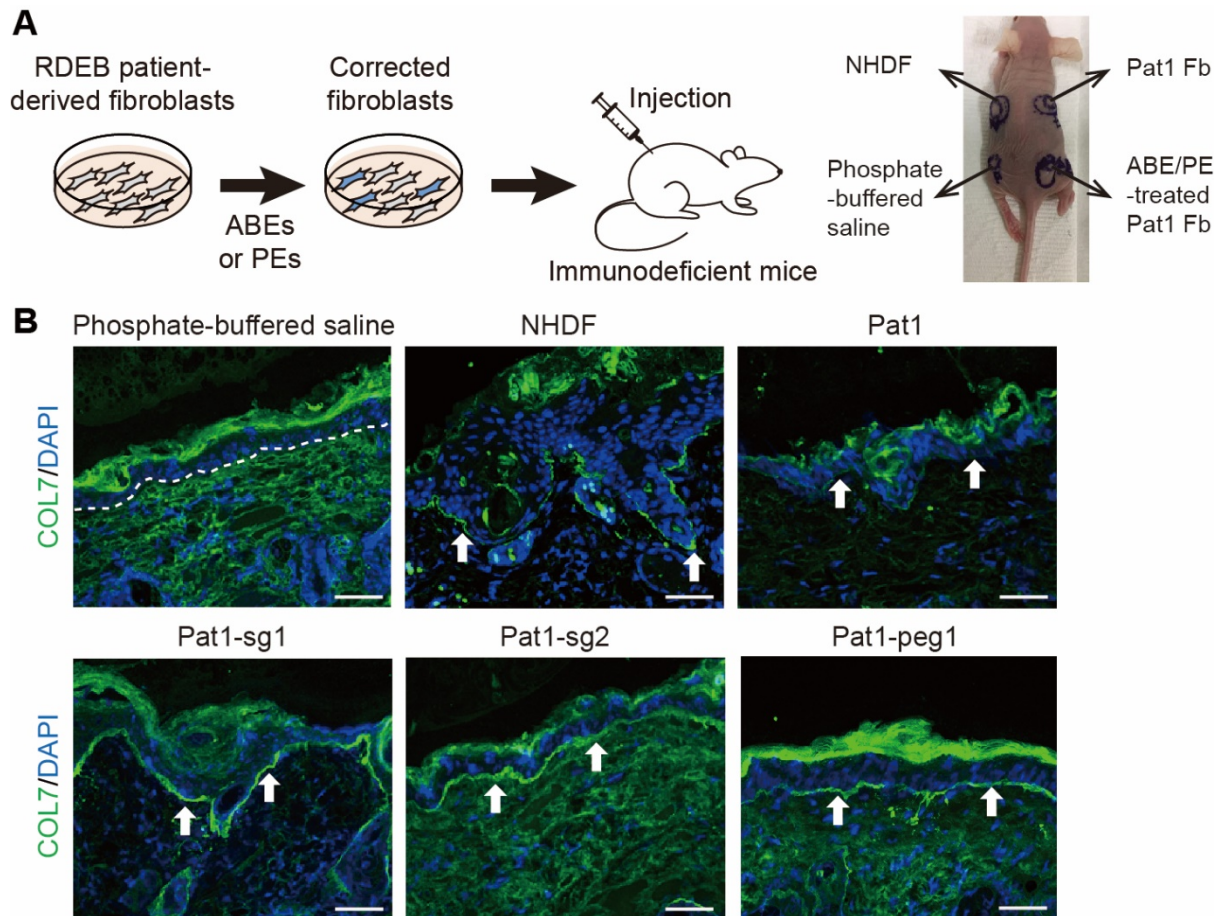

690

691 **Figure 4. Correct deposition of human C7 at the DEJ in immunodeficient mice after**  
692 **intradermal injection of ABE- or PE-treated primary RDEB fibroblasts.**

693 (a) Scheme of the experiment in which ABE-/PE-treated patient-derived fibroblasts were  
694 injected into the mouse model. (b) Immunofluorescence staining to visualize the C7 protein.  
695 NHDFs, non-edited fibroblasts from Pat1, ABE-treated RDEB fibroblasts, PE-treated RDEB  
696 fibroblasts ( $5 \times 10^6$  cells/ $150 \mu\text{l}$  of phosphate-buffered saline), or phosphate-buffered saline were  
697 intradermally injected into the back skin of immunodeficient mice. Two weeks after the  
698 injections, immunofluorescent analysis of C7 (green) was performed using a rabbit polyclonal  
699 antibody that recognizes human C7. The white dotted line indicates the DEJ. White arrows  
700 indicate human C7 deposited at the DEJ. Scale bars,  $50 \mu\text{m}$ . Fb, fibroblasts; NHDFs, normal  
701 human dermal fibroblasts.
